# Supplementary material for: Psychopathological Profile Associated with Food Addiction Symptoms in Adolescents with Eating Disorders
Source: MDPI journal article supplement (doi:10.3390/ijerph20043014), 2023-02-09
Supplement: s1 [file s1]

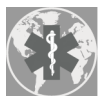

**Table S1.** Association between FA symptoms and psychopathological scales (pt.1)

|                                         | Amount    |           |        | Attempts  |           |        | Time      |           |       | Activities |           |       | Consequences |           |       | Tolerance |           |        |
|-----------------------------------------|-----------|-----------|--------|-----------|-----------|--------|-----------|-----------|-------|------------|-----------|-------|--------------|-----------|-------|-----------|-----------|--------|
|                                         | -         | +         | p      | -         | +         | p      | -         | +         | p     | -          | +         | p     | -            | +         | p     | -         | +         | p      |
| <b>Internalising Problems (YSR)</b>     | 40 (47.1) | 9 (52.9)  | 0.658  | 33 (42.9) | 16 (64.0) | 0.066  | 25 (38.5) | 24 (64.9) | 0.010 | 26 (38.8)  | 23 (65.7) | 0.010 | 29 (38.7)    | 20 (74.1) | 0.002 | 34 (43.0) | 15 (65.2) | 0.061  |
| <b>Externalising Problems (YSR)</b>     | 5 (5.9)   | 1 (5.9)   | 1.000  | 3 (3.9)   | 3 (12.0)  | 0.135  | 3 (4.6)   | 3 (8.1)   | 0.471 | 3 (4.5)    | 3 (8.6)   | 0.404 | 4 (5.3)      | 2 (7.4)   | 0.694 | 6 (7.6)   | 0 (0.0)   | 0.173  |
| <b>Total Problems (YSR)</b>             | 27 (31.8) | 5 (29.4)  | 0.849  | 22 (28.6) | 10 (40.0) | 0.285  | 15 (23.1) | 17 (45.9) | 0.017 | 18 (26.9)  | 14 (40.0) | 0.175 | 22 (29.3)    | 10 (37.0) | 0.459 | 24 (30.4) | 8 (34.8)  | 0.689  |
| <b>Drive for Thinness (EDI-3)</b>       | 44 (51.8) | 14 (82.4) | 0.020  | 41 (53.2) | 17 (68.0) | 0.196  | 33 (50.8) | 25 (67.6) | 0.100 | 30 (44.8)  | 28 (80.0) | 0.001 | 38 (50.7)    | 20 (74.1) | 0.035 | 40 (50.6) | 18 (78.3) | 0.019  |
| <b>Bulimia (EDI-3)</b>                  | 12 (14.1) | 11 (64.7) | <0.001 | 10 (13.0) | 13 (52.0) | <0.001 | 11 (16.9) | 12 (32.4) | 0.072 | 10 (14.9)  | 13 (37.1) | 0.011 | 12 (16.0)    | 11 (40.7) | 0.008 | 11 (13.9) | 12 (52.2) | <0.001 |
| <b>Body dissatisfaction (EDI-3)</b>     | 39 (45.9) | 9 (52.9)  | 0.595  | 38 (49.4) | 10 (40.0) | 0.416  | 26 (40.0) | 22 (59.5) | 0.058 | 28 (41.8)  | 20 (57.1) | 0.140 | 34 (45.3)    | 14 (51.9) | 0.561 | 35 (44.3) | 13 (56.5) | 0.302  |
| <b>Low Self-esteem (EDI-3)</b>          | 37 (43.5) | 8 (47.1)  | 0.789  | 33 (42.9) | 12 (48.0) | 0.653  | 27 (41.5) | 18 (48.6) | 0.487 | 28 (41.8)  | 17 (48.6) | 0.513 | 29 (38.7)    | 16 (59.3) | 0.065 | 31 (39.2) | 14 (60.9) | 0.066  |
| <b>Personal Alienation (EDI-3)</b>      | 37 (43.5) | 8 (47.1)  | 0.789  | 32 (41.6) | 13 (52.0) | 0.361  | 27 (41.5) | 18 (48.6) | 0.487 | 27 (40.3)  | 18 (51.4) | 0.282 | 30 (40.0)    | 15 (55.6) | 0.163 | 32 (40.5) | 13 (56.5) | 0.173  |
| <b>Interpersonal Insecurity (EDI-3)</b> | 31 (36.5) | 8 (47.1)  | 0.412  | 27 (35.1) | 12 (48.0) | 0.248  | 23 (35.4) | 16 (43.2) | 0.432 | 21 (31.3)  | 18 (51.4) | 0.048 | 25 (33.3)    | 14 (51.9) | 0.090 | 25 (31.6) | 14 (60.9) | 0.011  |
| <b>Interpersonal Alienation (EDI-3)</b> | 32 (37.6) | 7 (41.2)  | 0.785  | 26 (33.8) | 13 (52.0) | 0.103  | 22 (33.8) | 17 (45.9) | 0.227 | 22 (32.8)  | 17 (48.6) | 0.121 | 26 (34.7)    | 13 (48.1) | 0.216 | 28 (35.4) | 11 (47.8) | 0.282  |
| <b>Interoceptive Deficits (EDI-3)</b>   | 42 (49.4) | 12 (70.6) | 0.110  | 38 (49.4) | 16 (64.0) | 0.202  | 30 (46.2) | 24 (64.9) | 0.069 | 30 (44.8)  | 24 (68.6) | 0.022 | 32 (42.7)    | 22 (81.5) | 0.001 | 38 (48.1) | 16 (69.6) | 0.070  |
| <b>Emotional Dysregulation (EDI-3)</b>  | 40 (47.1) | 9 (52.9)  | 0.658  | 37 (48.1) | 12 (48.0) | 0.996  | 28 (43.1) | 21 (56.8) | 0.184 | 29 (43.3)  | 20 (57.1) | 0.183 | 33 (44.0)    | 16 (59.3) | 0.174 | 35 (44.3) | 14 (60.9) | 0.162  |
| <b>Perfectionism (EDI-3)</b>            | 31 (36.5) | 9 (52.9)  | 0.204  | 26 (33.8) | 14 (56.0) | 0.048  | 23 (35.4) | 17 (45.9) | 0.294 | 23 (34.3)  | 17 (48.6) | 0.162 | 27 (36.0)    | 13 (48.1) | 0.268 | 27 (34.2) | 13 (56.5) | 0.053  |
| <b>Asceticism (EDI-3)</b>               | 36 (42.4) | 10 (58.8) | 0.213  | 28 (36.4) | 18 (72.0) | 0.002  | 25 (38.5) | 21 (56.8) | 0.074 | 25 (37.3)  | 21 (60.0) | 0.029 | 31 (41.3)    | 15 (55.6) | 0.203 | 31 (39.2) | 15 (65.2) | 0.028  |
| <b>Maturity Fears (EDI-3)</b>           | 43 (50.6) | 9 (52.9)  | 0.859  | 32 (41.6) | 20 (80.0) | 0.001  | 28 (43.1) | 24 (64.9) | 0.034 | 28 (41.8)  | 24 (68.6) | 0.100 | 34 (45.3)    | 18 (66.7) | 0.057 | 35 (44.3) | 17 (74.0) | 0.012  |
| <b>Total Problems (MASC 2)</b>          | 11 (12.9) | 2 (11.8)  | 0.894  | 9 (11.7)  | 4 (16.0)  | 0.574  | 5 (7.7)   | 8 (21.6)  | 0.043 | 6 (9.0)    | 7 (20.0)  | 0.112 | 6 (8.0)      | 7 (25.9)  | 0.017 | 8 (10.1)  | 5 (21.7)  | 0.142  |
| <b>Total score (CDI 2)</b>              | 37 (43.5) | 9 (52.9)  | 0.477  | 31 (40.3) | 15 (60.0) | 0.085  | 25 (38.5) | 21 (56.8) | 0.074 | 25 (37.3)  | 21 (60.0) | 0.029 | 28 (37.3)    | 18 (66.7) | 0.009 | 32 (40.5) | 14 (60.9) | 0.084  |

The Pearson's chi-square test was used to evaluate the association between the presence of FA's symptoms (+ present; - absent) and clinical scores at YSR, EDI-3, MASC 2 and CDI 2 scales. Statistical significance for  $p < 0.05$ . CDI 2, Children Depression Inventory 2; EDI-3, Eating Disorder Inventory- 3; MASC 2, Multidimensional Anxiety Scale for Children 2; YSR, Youth Self Report.

**Table S2.** Association between FA symptoms and psychopathological scales (pt.2)

|                                         | Withdrawal |           |       | Problems  |           |        | Obligations |          |       | Situations |          |       | Craving   |           |        |
|-----------------------------------------|------------|-----------|-------|-----------|-----------|--------|-------------|----------|-------|------------|----------|-------|-----------|-----------|--------|
|                                         | -          | +         | p     | -         | +         | p      | -           | +        | p     | -          | +        | p     | -         | +         | p      |
| <b>Internalising Problems (YSR)</b>     | 16 (32.0)  | 33 (63.5) | 0.001 | 28 (39.4) | 21 (67.7) | 0.008  | 45 (47.9)   | 4 (50.0) | 0.908 | 43 (47.3)  | 6 (54.5) | 0.647 | 33 (42.9) | 16 (64.0) | 0.066  |
| <b>Externalising Problems (YSR)</b>     | 1 (2.0)    | 5 (9.6)   | 0.102 | 4 (5.6)   | 2 (6.5)   | 0.872  | 5 (5.3)     | 1 (12.5) | 0.407 | 6 (6.6)    | 0 (0.0)  | 0.380 | 3 (3.9)   | 3 (12.0)  | 0.135  |
| <b>Total Problems (YSR)</b>             | 8 (16.0)   | 24 (46.2) | 0.001 | 17 (23.9) | 15 (48.4) | 0.014  | 29 (30.9)   | 3 (37.5) | 0.697 | 28 (30.8)  | 4 (36.4) | 0.706 | 22 (28.6) | 10 (40.0) | 0.285  |
| <b>Drive for Thinness (EDI-3)</b>       | 22 (44.0)  | 36 (69.2) | 0.010 | 31 (43.7) | 27 (87.1) | <0.001 | 51 (54.3)   | 7 (87.5) | 0.068 | 51 (56.0)  | 7 (63.6) | 0.631 | 41 (53.2) | 17 (68.0) | 0.196  |
| <b>Bulimia (EDI-3)</b>                  | 7 (14.0)   | 16 (30.8) | 0.043 | 13 (18.3) | 10 (32.3) | 0.121  | 18 (19.1)   | 5 (62.5) | 0.005 | 17 (18.7)  | 6 (54.5) | 0.007 | 10 (13.0) | 13 (52.0) | <0.001 |
| <b>Body dissatisfaction (EDI-3)</b>     | 19 (38.0)  | 29 (55.8) | 0.072 | 30 (42.3) | 18 (58.1) | 0.141  | 43 (45.7)   | 5 (62.5) | 0.362 | 43 (47.3)  | 5 (45.5) | 0.910 | 38 (49.4) | 10 (40.0) | 0.416  |
| <b>Low Self-esteem (EDI-3)</b>          | 18 (36.0)  | 27 (51.9) | 0.105 | 29 (40.8) | 16 (51.6) | 0.314  | 39 (41.5)   | 6 (75.0) | 0.067 | 41 (45.1)  | 4 (36.4) | 0.583 | 33 (42.9) | 12 (48.0) | 0.653  |
| <b>Personal Alienation (EDI-3)</b>      | 17 (34.0)  | 28 (53.8) | 0.044 | 28 (39.4) | 17 (54.8) | 0.150  | 42 (44.7)   | 3 (37.5) | 0.695 | 39 (42.9)  | 6 (54.5) | 0.461 | 32 (41.6) | 13 (52.0) | 0.361  |
| <b>Interpersonal Insecurity (EDI-3)</b> | 14 (28.0)  | 25 (48.1) | 0.037 | 22 (31.0) | 17 (54.8) | 0.023  | 36 (38.3)   | 3 (37.5) | 0.964 | 31 (34.1)  | 8 (72.7) | 0.013 | 27 (35.1) | 12 (48.0) | 0.248  |
| <b>Interpersonal Alienation (EDI-3)</b> | 14 (28.0)  | 25 (48.1) | 0.037 | 25 (35.2) | 14 (45.2) | 0.342  | 36 (38.3)   | 3 (37.5) | 0.964 | 34 (37.4)  | 5 (45.5) | 0.602 | 26 (33.8) | 13 (52.0) | 0.103  |
| <b>Interoceptive Deficits (EDI-3)</b>   | 19 (38.0)  | 35 (67.3) | 0.003 | 33 (46.5) | 21 (67.7) | 0.048  | 48 (51.1)   | 6 (75.0) | 0.193 | 47 (51.6)  | 7 (63.6) | 0.452 | 38 (49.4) | 16 (64.0) | 0.202  |
| <b>Emotional Dysregulation (EDI-3)</b>  | 18 (36.0)  | 31 (59.6) | 0.017 | 27 (38.0) | 22 (71.0) | 0.002  | 44 (46.8)   | 5 (62.5) | 0.394 | 42 (46.2)  | 7 (63.6) | 0.273 | 37 (48.1) | 12 (48.0) | 0.996  |
| <b>Perfectionism (EDI-3)</b>            | 15 (30.0)  | 25 (48.1) | 0.062 | 28 (39.4) | 12 (38.7) | 0.945  | 35 (37.2)   | 5 (62.5) | 0.160 | 33 (36.3)  | 7 (63.6) | 0.079 | 26 (33.8) | 14 (56.0) | 0.048  |
| <b>Asceticism (EDI-3)</b>               | 17 (34.0)  | 29 (55.8) | 0.027 | 26 (36.6) | 20 (64.5) | 0.009  | 40 (42.6)   | 6 (75.0) | 0.077 | 39 (42.9)  | 7 (63.6) | 0.191 | 28 (36.4) | 18 (72.0) | 0.002  |
| <b>Maturity Fears (EDI-3)</b>           | 19 (38.0)  | 33 (63.4) | 0.010 | 34 (47.9) | 18 (58.1) | 0.344  | 48 (51.1)   | 4 (50.0) | 0.954 | 45 (49.5)  | 7 (63.6) | 0.374 | 32 (41.6) | 20 (80.0) | 0.001  |
| <b>Total Problems (MASC 2)</b>          | 4 (8.0)    | 9 (17.3)  | 0.159 | 8 (11.3)  | 5 (16.1)  | 0.498  | 12 (12.8)   | 1 (12.5) | 0.983 | 11 (12.1)  | 2 (18.2) | 0.567 | 9 (11.7)  | 4 (16.0)  | 0.574  |
| <b>Total score (CDI 2)</b>              | 16 (32.0)  | 30 (57.7) | 0.009 | 27 (38.0) | 19 (61.3) | 0.030  | 42 (44.7)   | 4 (50.0) | 0.772 | 40 (44.0)  | 6 (54.5) | 0.505 | 31 (40.3) | 15 (60.0) | 0.085  |

The Pearson's chi-square test was used to evaluate the association between the presence of FA's symptoms (+ present; - absent) and clinical scores at YSR, EDI-3, MASC 2 and CDI 2 scales. Statistical significance for  $p < 0.05$ . CDI 2, Children Depression Inventory 2; EDI-3, Eating Disorder Inventory- 3; MASC 2, Multidimensional Anxiety Scale for Children 2; YSR, Youth Self Report.
